# Supplementary material for: The intrinsic circadian clock in podocytes controls glomerular filtration rate
Source: PubMed Central journal article supplement (PMC6838779; doi:10.1038/s41598-019-52682-9), 2019-11-06
Supplement: 41598_2019_52682_MOESM1_ESM.pdf [file 41598_2019_52682_MOESM1_ESM.pdf]

## SUPPLEMENTARY INFORMATION

The intrinsic circadian clock in podocytes controls glomerular filtration rate.

Camille Ansermet<sup>1#</sup>, Gabriel Centeno<sup>1#</sup>, Svetlana Nikolaeva<sup>1,2</sup>, Marc P. Maillard<sup>3</sup>, Sylvain Pradervand<sup>4</sup> and Dmitri Firsov<sup>1\*</sup>

<sup>1</sup> - Department of Pharmacology and Toxicology, University of Lausanne, Switzerland

<sup>2</sup> - Institute of Evolutionary Physiology and Biochemistry, Russian Academy of Sciences, St-Petersburg, Russia

<sup>3</sup> - Service of Nephrology, Centre Hospitalier Universitaire Vaudois, Lausanne, Switzerland

<sup>4</sup> - Genomic Technologies Facility, University of Lausanne, Switzerland

# - these authors contributed equally to this work

\* - to whom correspondence should be addressed:

Dmitri Firsov, Department of Pharmacology and Toxicology, University of Lausanne, 27 rue du Bugnon, 1005 Lausanne, Switzerland. Phone: ++ 41-216925406

e-mail: dmitri.firsov@unil.ch

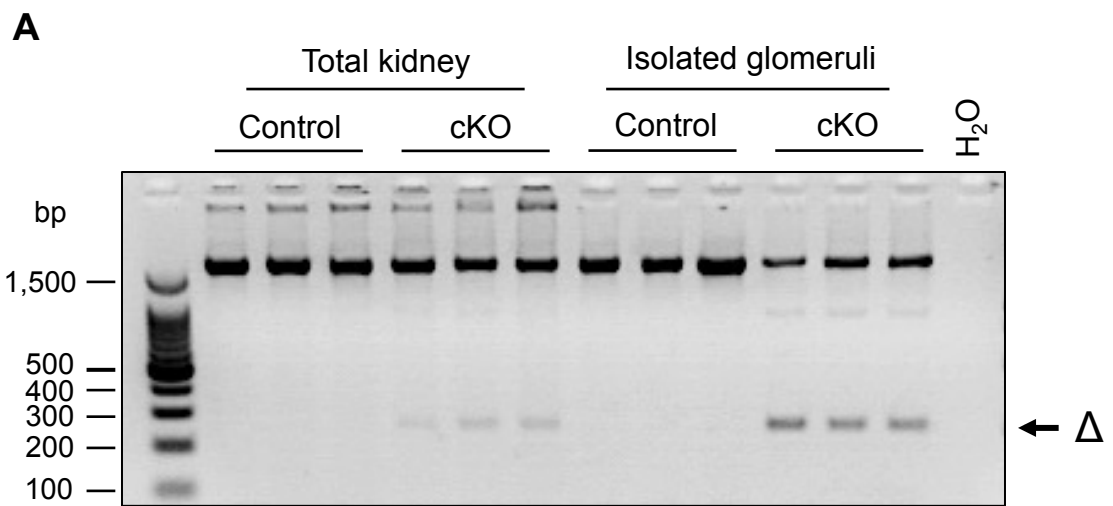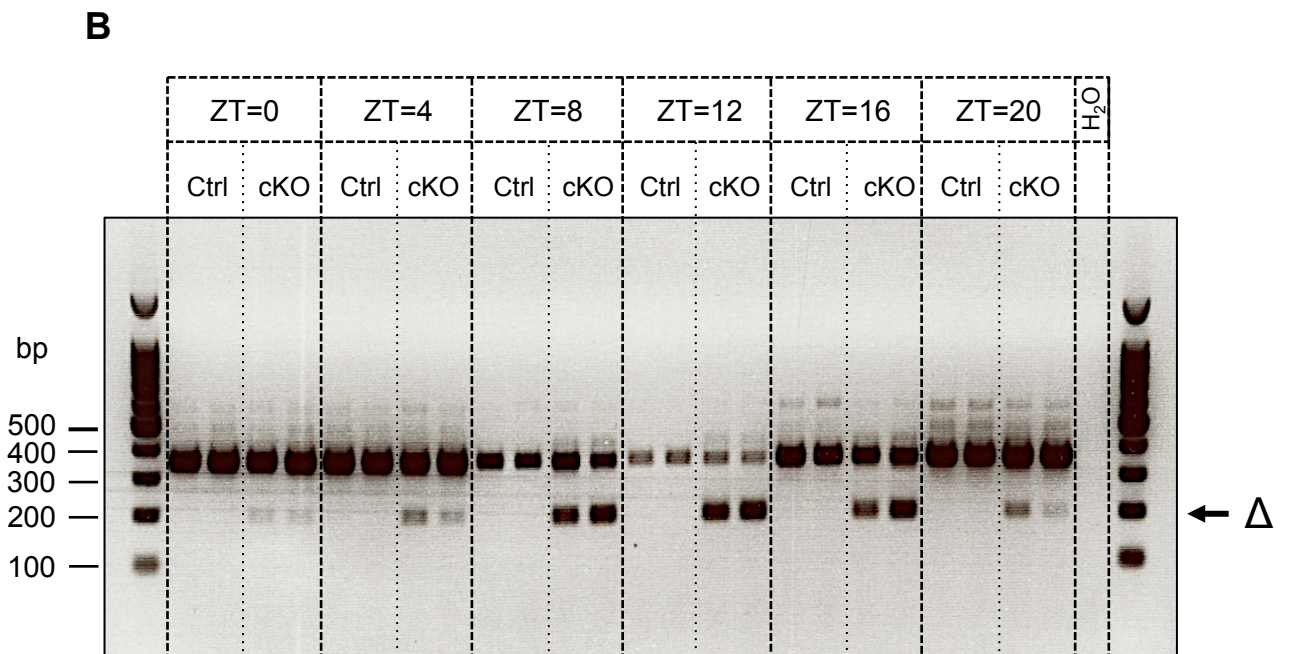

**Supplementary Figure 1. (A)** Genomic DNA *Bmal1* excision in Control and cKO total kidney extract and isolated glomeruli. **(B)** cDNA *Bmal1* excision at different circadian timepoints in Control and cKO isolated glomeruli.  $\Delta$ =excised *Bmal1* fragment.

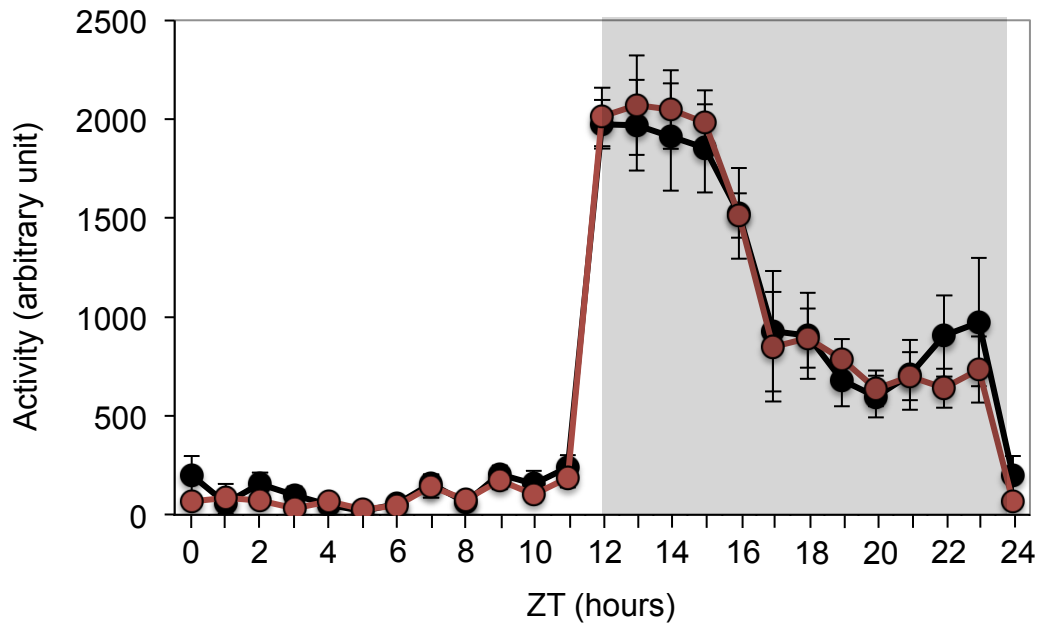

**Supplementary Figure 2.** Every-hour locomotor activity recorded in Control (black) and cKO (red) mice during 5 consecutive days. Values are means  $\pm$  SEM. n=6 Control mice, n=6 cKO mice.

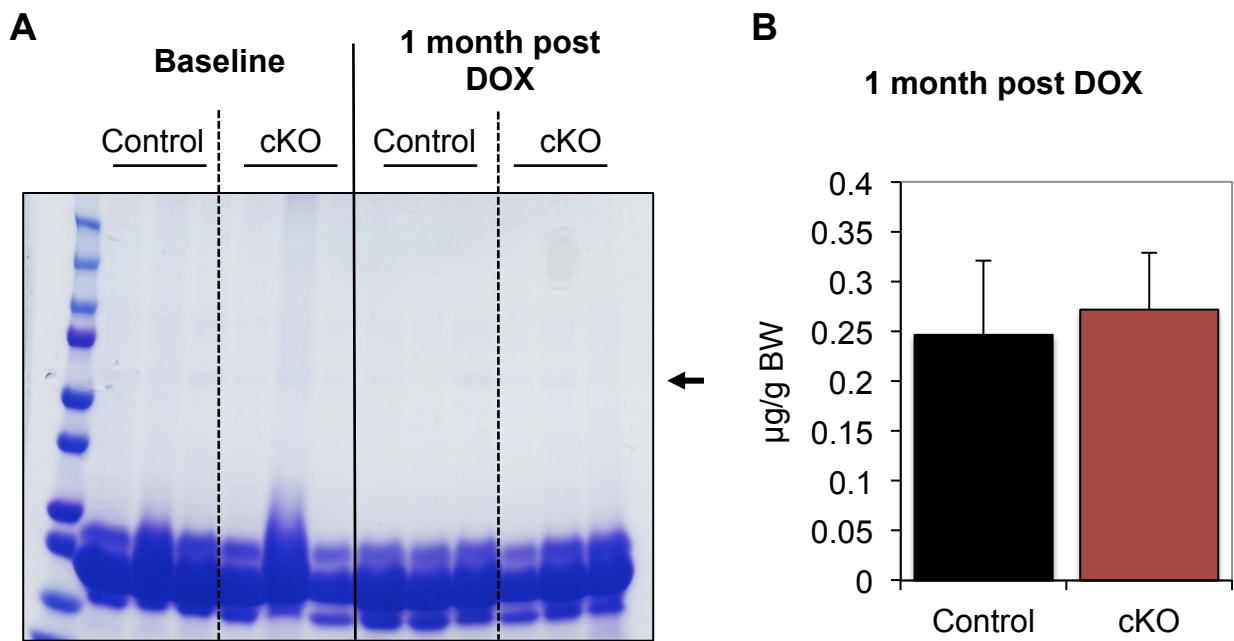

**Supplementary Figure 3. (A)** Coomassie blue-stained 24-hour urine of Control and cKO mice before (baseline) and 1 month after the DOX treatment. The arrow indicates the expected size for albumin (~65kDa). **(B)** Quantitative dosage of albumin in 24-hour urine collected 1 month after the DOX treatment.



**A Baseline****B 1 month post DOX**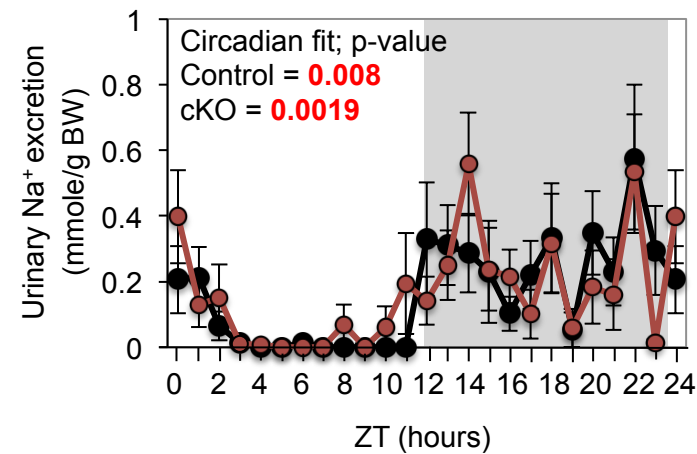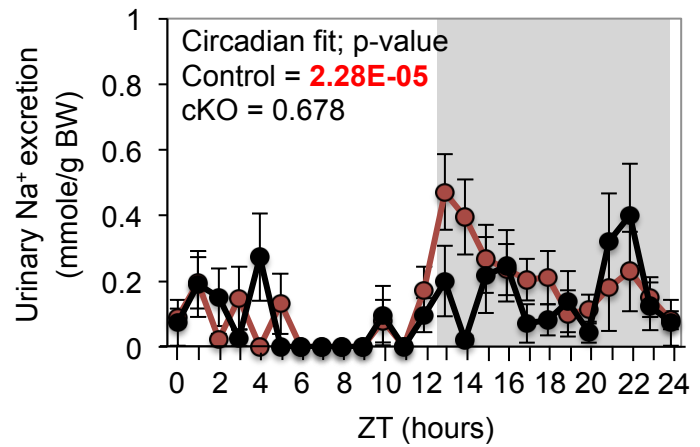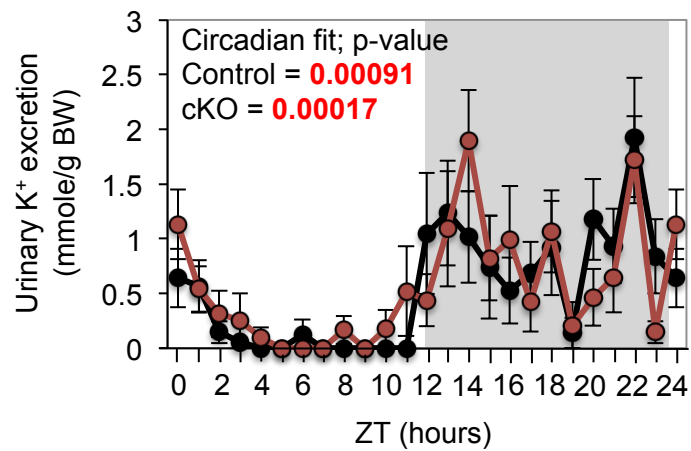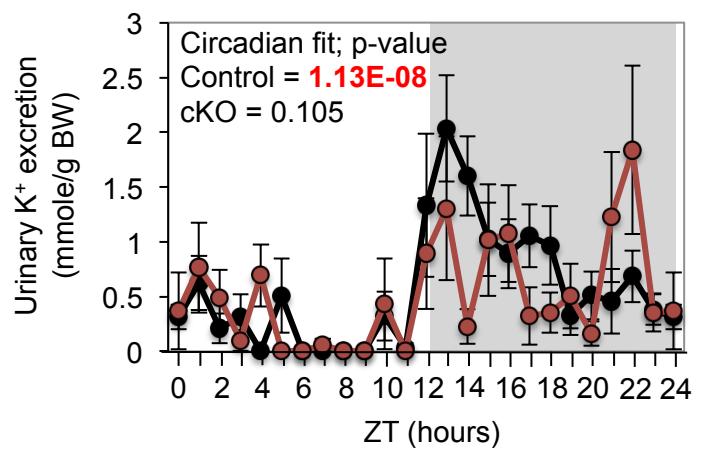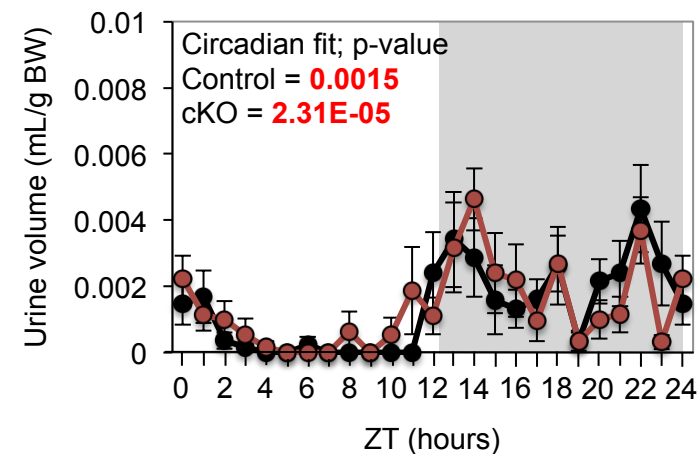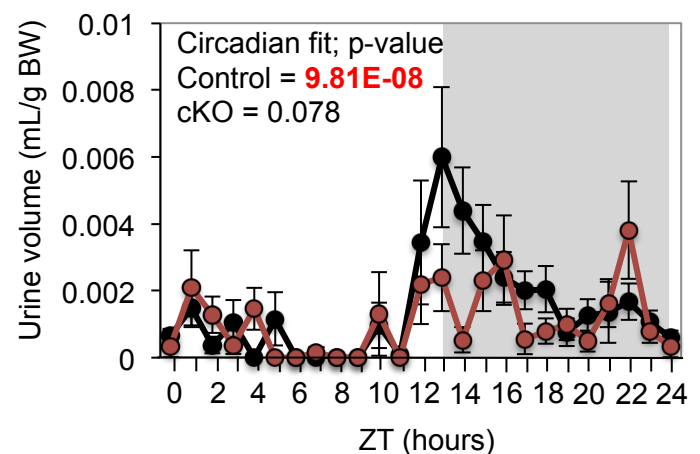

**Supplementary Figure 4.** Every-hour urinary Na<sup>+</sup>, K<sup>+</sup> and water excretion of Control (black) and cKO (red) mice **(A)** before (baseline) and **(B)** 1 month after DOX treatment. Values are means  $\pm$  SEM. Circadian fit were assessed with cosine curve fitting analysis. n=12 Control mice, n=11 cKO mice.

### A Baseline

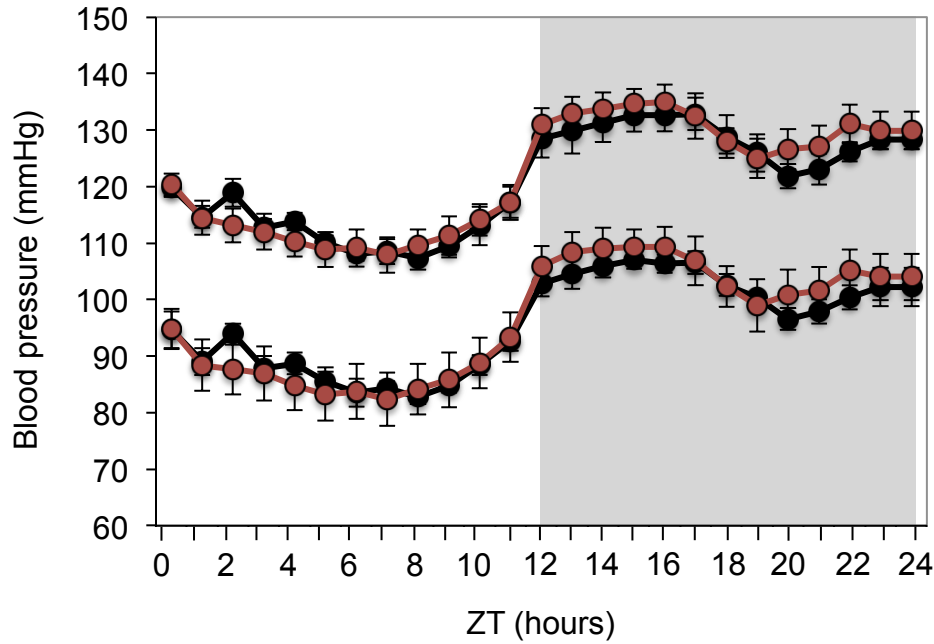

### B 1 month post DOX

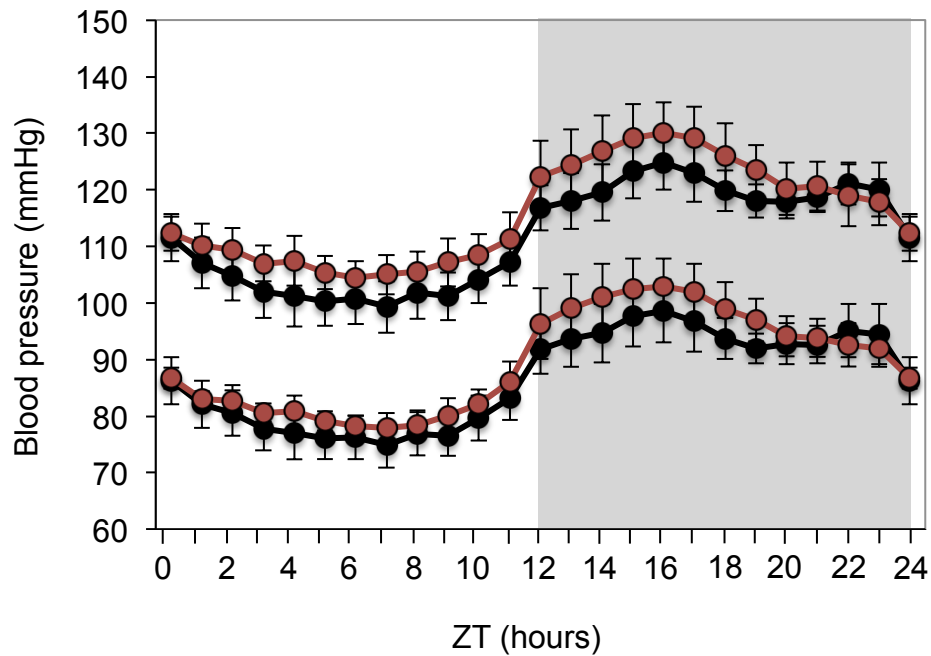

**Supplementary Figure 5.** Telemetry-measured systolic and diastolic blood pressure of Control (black) and cKO (red) mice **(A)** before (baseline) and **(B)** 1 month after DOX treatment. Each point corresponds to the mean  $\pm$  SEM of 7 consecutive days of measurements. n=5 Control mice, n=5 cKO mice.

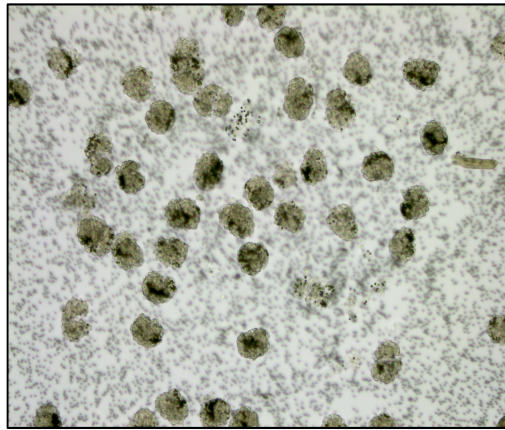

**Supplementary Figure 6.** Representative microscopic image of glomeruli recovered after isolation and washing steps and used for RNA sequencing. Magnification 100X. Bright field.

**Supplementary Table 1. General parameters, 1 month post DOX.**

|                                       | Control (n=6) | cKO (n=6)   | p    |
|---------------------------------------|---------------|-------------|------|
| Body weight (g)                       | 28.16±0.43    | 27.95±0.63  | NS   |
| Food intake/g BW (g/g)                | 0.17±0.01     | 0.17±0.005  | NS   |
| Water intake/g BW (ml/g)              | 0.19±0.02     | 0.18±0.01   | NS   |
| <u>24-hour urine</u>                  |               |             |      |
|                                       | Control (n=6) | cKO (n=6)   | p    |
| Urine volume/BW (ml/g)                | 0.029±0.005   | 0.016±0.004 | NS   |
| UVxNa+/g BW (μmol/g)                  | 4.85±0.98     | 4.76±1.66   | NS   |
| UVxK+/g BW (μmol/g)                   | 18.41±3.24    | 11.96±2.77  | NS   |
| Na+/K+                                | 0.36±0.11     | 0.39±0.06   | NS   |
| UVxCreatinine/g BW (μmol/g)           | 0.19±0.03     | 0.16±0.03   | NS   |
| <u>Plasma (ZT6)</u>                   |               |             |      |
|                                       | Control (n=6) | cKO (n=6)   | p    |
| Osmolality (mOsm/kg H <sub>2</sub> O) | 320.6±1.1     | 323±2.9     | NS   |
| Na <sup>+</sup> (mM)                  | 154.6±0.7     | 153.5±0.5   | NS   |
| K <sup>+</sup> (mM)                   | 3.61±0.07     | 4.03±0.18   | 0.04 |
| Creatinine (μM)                       | 17.06±0.93    | 17.95±2.08  | NS   |

Supplementary Table 2. Genes differentially expressed between Control and cKO glomeruli at one or more ZT

| Gene          | logFC_ZT0 | logFC_ZT4 | logFC_ZT8 | logFC_ZT12 | logFC_ZT16 | logFC_ZT20 | F     | adj.P.Val | ZT (Posthoc test)          |
|---------------|-----------|-----------|-----------|------------|------------|------------|-------|-----------|----------------------------|
| Nsf           | -0.88     | -0.80     | -0.79     | -0.48      | -0.80      | -0.63      | 76.12 | 5.1E-10   | ZT0 ZT4 ZT8 ZT12 ZT16 ZT20 |
| Adam11        | 2.51      | 3.29      | 2.72      | 1.90       | 2.72       | 2.90       | 57.89 | 5.1E-09   | ZT0 ZT4 ZT8 ZT12 ZT16 ZT20 |
| Ccdc43        | 0.81      | 0.89      | 0.60      | 0.34       | 0.54       | 0.61       | 47.41 | 2.9E-08   | ZT0 ZT4 ZT8 ZT12 ZT16 ZT20 |
| Fzd2          | 0.75      | 1.00      | 0.34      | 0.39       | 0.23       | 0.89       | 34.21 | 6.8E-07   | ZT0 ZT4 ZT8 ZT12 ZT20      |
| Aff3          | -1.12     | -0.96     | -0.98     | -0.61      | -1.08      | -0.81      | 30.52 | 1.8E-06   | ZT0 ZT4 ZT8 ZT12 ZT16 ZT20 |
| Psmc3ip       | 2.07      | 1.87      | 1.40      | 0.97       | 1.53       | 2.10       | 26.81 | 5.4E-06   | ZT0 ZT4 ZT8 ZT12 ZT16 ZT20 |
| Wnt8b         | 1.02      | 1.45      | 1.29      | 1.35       | 1.75       | 1.08       | 26.14 | 6.0E-06   | ZT0 ZT4 ZT8 ZT12 ZT16 ZT20 |
| Tlr7          | -1.02     | -0.96     | -1.15     | -0.56      | -1.14      | -0.89      | 25.39 | 7.0E-06   | ZT0 ZT4 ZT8 ZT12 ZT16 ZT20 |
| Ctsl          | 0.30      | 0.33      | 0.37      | 0.50       | 0.67       | 0.73       | 23.89 | 1.1E-05   | ZT0 ZT4 ZT8 ZT12 ZT16 ZT20 |
| Abca9         | -0.92     | -0.57     | -0.60     | -0.46      | -0.65      | -0.48      | 21.00 | 3.6E-05   | ZT0 ZT4 ZT8 ZT12 ZT16 ZT20 |
| Dpy19l3       | 0.22      | 0.05      | 0.07      | 0.60       | 0.41       | 0.29       | 20.55 | 4.0E-05   | ZT12 ZT16 ZT20             |
| Kpna2         | -0.78     | -0.79     | -0.87     | -0.42      | -0.63      | -0.98      | 20.20 | 4.3E-05   | ZT0 ZT4 ZT8 ZT16 ZT20      |
| Cry1          | 0.20      | 1.17      | 0.88      | 0.41       | 0.26       | 0.12       | 19.89 | 4.6E-05   | ZT4 ZT8                    |
| 2610204G07Rik | -2.19     | -1.52     | -1.17     | -1.09      | -1.77      | -1.48      | 18.24 | 9.6E-05   | ZT0 ZT4 ZT8 ZT12 ZT16 ZT20 |
| Ablim3        | 0.41      | 0.40      | 0.69      | 0.72       | 0.99       | 0.77       | 17.42 | 1.4E-04   | ZT8 ZT12 ZT16 ZT20         |
| Rorc          | 0.05      | 1.12      | 0.68      | 0.13       | -0.20      | -0.03      | 16.80 | 1.8E-04   | ZT4 ZT8                    |
| F3            | -0.63     | -0.14     | -0.38     | -0.39      | -0.62      | -0.42      | 16.10 | 2.4E-04   | ZT0 ZT8 ZT12 ZT16 ZT20     |
| Csdc2         | 0.23      | 0.70      | 1.26      | 1.67       | 1.40       | 0.48       | 16.09 | 2.4E-04   | ZT8 ZT12 ZT16              |
| Daam2         | 0.06      | 0.07      | 0.48      | 0.58       | 0.62       | 0.41       | 15.59 | 3.0E-04   | ZT8 ZT12 ZT16 ZT20         |
| Vmn1r32       | 4.61      | 3.35      | 3.89      | 4.03       | 2.44       | 5.05       | 14.02 | 7.0E-04   | ZT0 ZT4 ZT8 ZT12 ZT20      |
| Sulf2         | 0.83      | 1.01      | 1.07      | 0.39       | 0.52       | 0.43       | 14.01 | 7.0E-04   | ZT0 ZT4 ZT8                |
| Il34          | -0.34     | -0.20     | -0.33     | -0.09      | -0.42      | -0.29      | 13.75 | 7.9E-04   | ZT0 ZT8 ZT16 ZT20          |
| Thsd7a        | -0.67     | -0.12     | -0.44     | 0.00       | -0.17      | -0.43      | 13.69 | 7.9E-04   | ZT0 ZT8 ZT20               |
| Gm12586       | 4.13      | 6.40      | 3.54      | 2.67       | 3.82       | 0.06       | 13.26 | 9.9E-04   | ZT0 ZT4 ZT8 ZT16           |
| Sybu          | -0.48     | -0.73     | -0.40     | -0.24      | -0.31      | -0.54      | 13.13 | 1.0E-03   | ZT0 ZT4 ZT8 ZT20           |

|               |       |       |       |       |       |       |       |         |                        |
|---------------|-------|-------|-------|-------|-------|-------|-------|---------|------------------------|
| Ggt5          | 0.05  | 0.19  | 0.37  | 0.70  | 1.06  | 0.26  | 13.04 | 1.0E-03 | ZT12 ZT16              |
| Gna12         | -0.13 | -0.13 | -0.36 | -0.25 | -0.28 | -0.10 | 13.02 | 1.0E-03 | ZT8 ZT12 ZT16          |
| Gaa           | -0.39 | -0.32 | -0.34 | -0.19 | -0.28 | -0.02 | 12.28 | 1.6E-03 | ZT0 ZT4 ZT8 ZT16       |
| Olfr1034      | 0.69  | 1.91  | 0.42  | 1.29  | 0.63  | -0.12 | 12.09 | 1.8E-03 | ZT4 ZT12               |
| Npas2         | 0.18  | 0.59  | 3.62  | 4.24  | 3.24  | 0.60  | 11.50 | 2.7E-03 | ZT8 ZT12 ZT16          |
| Foxs1         | 0.18  | 0.53  | 1.98  | 1.88  | 0.71  | 0.19  | 11.42 | 2.7E-03 | ZT8 ZT12               |
| Nr1h4         | 0.65  | -0.65 | -0.29 | 0.47  | -0.03 | -0.36 | 11.41 | 2.7E-03 | ZT0 ZT4 ZT12           |
| Dusp15        | 0.13  | 0.59  | 0.89  | 1.05  | 0.74  | 0.00  | 11.33 | 2.7E-03 | ZT8 ZT12 ZT16          |
| Tcf21         | -0.68 | -0.28 | -0.65 | -0.14 | -0.63 | -0.31 | 11.26 | 2.8E-03 | ZT0 ZT8 ZT16           |
| Kcna6         | -1.91 | -0.57 | -1.36 | -0.90 | -1.24 | -1.30 | 11.15 | 2.9E-03 | ZT0 ZT8 ZT16 ZT20      |
| Nbl1          | 0.35  | 0.56  | 0.33  | 0.34  | 0.49  | 0.43  | 11.07 | 3.0E-03 | ZT0 ZT4 ZT12 ZT16 ZT20 |
| Ccbe1         | -1.72 | -1.17 | -0.97 | -0.82 | -1.17 | -0.56 | 10.97 | 3.2E-03 | ZT0 ZT4 ZT16           |
| Mgat5b        | -1.36 | -1.46 | -0.74 | -0.41 | -0.81 | -0.87 | 10.67 | 3.9E-03 | ZT0 ZT4                |
| Uaca          | -0.30 | -0.11 | -0.29 | -0.24 | -0.31 | -0.09 | 10.37 | 4.8E-03 | ZT0 ZT8 ZT12 ZT16      |
| Celf3         | 0.44  | 1.30  | 2.29  | 2.19  | 1.20  | 0.96  | 10.19 | 5.3E-03 | ZT8 ZT12               |
| Slc38a4       | -0.36 | -0.41 | -0.43 | -0.01 | -0.54 | -0.35 | 10.11 | 5.6E-03 | ZT0 ZT4 ZT8 ZT16       |
| Pmepa1        | -0.33 | -0.14 | -0.37 | -0.18 | -0.49 | -0.35 | 9.91  | 6.3E-03 | ZT0 ZT8 ZT16 ZT20      |
| sept.06       | -0.32 | -0.37 | -0.46 | -0.23 | -0.63 | -0.25 | 9.85  | 6.5E-03 | ZT8 ZT16               |
| 1700052K11Rik | 0.57  | 0.50  | 0.48  | 0.44  | 0.33  | 0.41  | 9.72  | 7.1E-03 | ZT0 ZT4 ZT8 ZT12       |
| Srrm4         | -0.12 | 0.21  | 0.46  | 0.78  | 0.26  | 0.10  | 9.52  | 8.1E-03 | ZT12                   |
| Creb3l1       | -0.18 | 0.15  | 1.09  | 1.06  | 0.43  | 0.05  | 9.31  | 9.4E-03 | ZT8 ZT12               |
| Lpcat4        | 0.32  | 0.27  | 0.00  | 0.22  | 0.12  | 0.22  | 9.16  | 1.0E-02 | ZT0 ZT4                |
| Sowahd        | -0.81 | -0.37 | -0.87 | 0.02  | -0.66 | -0.06 | 8.97  | 1.2E-02 | ZT0 ZT8                |
| Pcsk2         | -0.10 | -0.51 | 0.65  | 2.48  | 2.73  | 0.80  | 8.97  | 1.2E-02 | ZT12 ZT16              |
| Vgll3         | -0.65 | -0.37 | -0.41 | -0.34 | -0.40 | -0.87 | 8.86  | 1.3E-02 | ZT0 ZT20               |
| Fhod3         | -0.50 | -0.23 | -0.12 | -0.16 | -0.48 | 0.10  | 8.80  | 1.3E-02 | ZT0 ZT16               |
| Prdx6         | -0.10 | -0.06 | -0.16 | -0.17 | -0.37 | -0.19 | 8.62  | 1.5E-02 | ZT16                   |
| Kcnj2         | 0.65  | 0.65  | 0.82  | 0.32  | 0.41  | 0.66  | 8.41  | 1.8E-02 | ZT0 ZT4 ZT8 ZT20       |
| Ucp2          | -0.44 | -0.02 | -0.29 | -0.07 | -0.49 | -0.02 | 8.23  | 2.1E-02 | ZT0 ZT16               |

|               |       |       |       |       |       |       |      |         |               |
|---------------|-------|-------|-------|-------|-------|-------|------|---------|---------------|
| Racgap1       | -0.51 | 0.25  | -0.52 | -0.26 | -0.05 | -0.58 | 8.14 | 2.2E-02 | ZT0 ZT8 ZT20  |
| Gprc5a        | 0.21  | 0.42  | 0.78  | 0.53  | 0.64  | 0.34  | 8.08 | 2.2E-02 | ZT8 ZT16      |
| Ptchd4        | -0.34 | -0.49 | -0.92 | -0.53 | -0.98 | -0.70 | 8.05 | 2.3E-02 | ZT8 ZT16      |
| Wnt4          | -0.75 | -0.53 | -0.36 | -0.29 | -0.54 | -0.36 | 8.01 | 2.3E-02 | ZT0           |
| Arhgap24      | -0.34 | -0.10 | -0.21 | -0.05 | -0.35 | -0.12 | 7.86 | 2.6E-02 | ZT0 ZT16      |
| Gm4875        | 3.85  | 5.35  | 2.30  | 5.23  | 0.56  | 6.00  | 7.81 | 2.7E-02 | ZT4 ZT12 ZT20 |
| Gm12829       | -1.59 | -0.82 | -1.13 | -0.25 | -0.41 | -0.22 | 7.78 | 2.7E-02 | ZT0           |
| Hip1r         | -0.03 | 0.09  | 0.34  | 0.52  | 0.16  | 0.13  | 7.72 | 2.8E-02 | ZT12          |
| Tspan11       | 1.10  | 1.49  | 1.11  | 1.67  | 1.42  | 1.36  | 7.52 | 3.4E-02 | ZT4 ZT12      |
| RP23-365O13.3 | -0.80 | 0.00  | -0.97 | -0.41 | -0.83 | -0.52 | 7.50 | 3.4E-02 | ZT8           |
| Tmtc1         | -0.43 | -0.27 | -0.25 | -0.16 | -0.49 | -0.31 | 7.38 | 3.7E-02 | ZT16          |
| Dusp14        | 0.54  | 0.49  | 0.12  | 0.53  | -0.18 | 0.06  | 7.36 | 3.7E-02 | ZT0 ZT12      |
| Rora          | -0.06 | -0.13 | -0.14 | -0.15 | -0.24 | -0.27 | 7.32 | 3.8E-02 | ZT20          |
| Itgb4         | 0.18  | -0.02 | -0.42 | -0.07 | 0.16  | 0.66  | 7.20 | 4.3E-02 | ZT20          |
| Cyp2s1        | 0.07  | 0.46  | 0.12  | 0.05  | 0.01  | 0.73  | 7.05 | 4.8E-02 | ZT20          |
| Ccnjl         | 0.22  | 0.27  | 1.31  | 1.12  | 0.33  | 0.39  | 7.02 | 4.9E-02 | ZT8           |
| Leo1          | -0.02 | 0.13  | 0.58  | 0.81  | 0.25  | 0.06  | 7.00 | 4.9E-02 | ZT12          |
